# Supplementary material for: Defining internal target volume using positron emission tomography for radiation therapy planning of moving lung tumors
Source: PubMed Central journal article supplement (PMC5711243; doi:10.1120/jacmp.v15i1.4600), 2014-01-06
Supplement: ACM2-15-279-s001.pdf [file ACM2-15-279-s001.pdf]

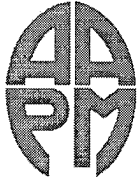

**American Association of Physicists in Medicine**

One Physics Ellipse  
College Park, MD 20740-3846  
(301) 209-3350  
Fax (301) 209-0862  
<http://www.aapm.org>

*Office of the Executive Director*

Angela R. Keyser  
Phone: 301-209-3385 Fax: 301-209-0862  
E-mail: [akeyser@aapm.org](mailto:akeyser@aapm.org)

**DATE OF REQUEST:** 5/9/2013

**FROM:**

Adam C. Riegel, Ph.D.  
Dept. of Radiation Medicine, North Shore LIJ Health System, 270-05 76th Ave, New Hyde Park, NY 11040

**EMAIL ADDRESS:** [ariegel@nshs.edu](mailto:ariegel@nshs.edu)

**1. Permission is granted to:**

Adam C. Riegel, Ph.D.  
Dept. of Radiation Medicine, North Shore LIJ Health System, 270-05 76th Ave, New Hyde Park, NY 11040

**2. Permission is requested to use the following material:**

Riegel AC, Bucci MK, Mawlawi OR, Johnson V, Ahmad M, Sun X, Luo D, Chandler AG, Pan T, "Target definition of moving lung tumors in positron emission tomography: Correlation of optimal activity concentration thresholds with object size, motion extent, and source-to-background ratio." *Med. Phys.* 2010 Apr;37(4):1742-52, Figures 3 and 5.

**3. For what purpose:**

I would like to use these two figures in an upcoming paper. Thank you.

Authors seeking permission must also notify the first author of the article from which permission is being sought.

Permission is hereby granted:

\_\_\_\_\_  
**Signature**

05/14/13

\_\_\_\_\_  
**Date**
